# Supplementary material
Source: PubMed Central journal article supplement (PMC3174675)
Supplement: 1108237108_pnas.201108237SI.pdf [file 1108237108_pnas.201108237SI.pdf]

# Supporting Information

Ilic et al. 10.1073/pnas.1108237108

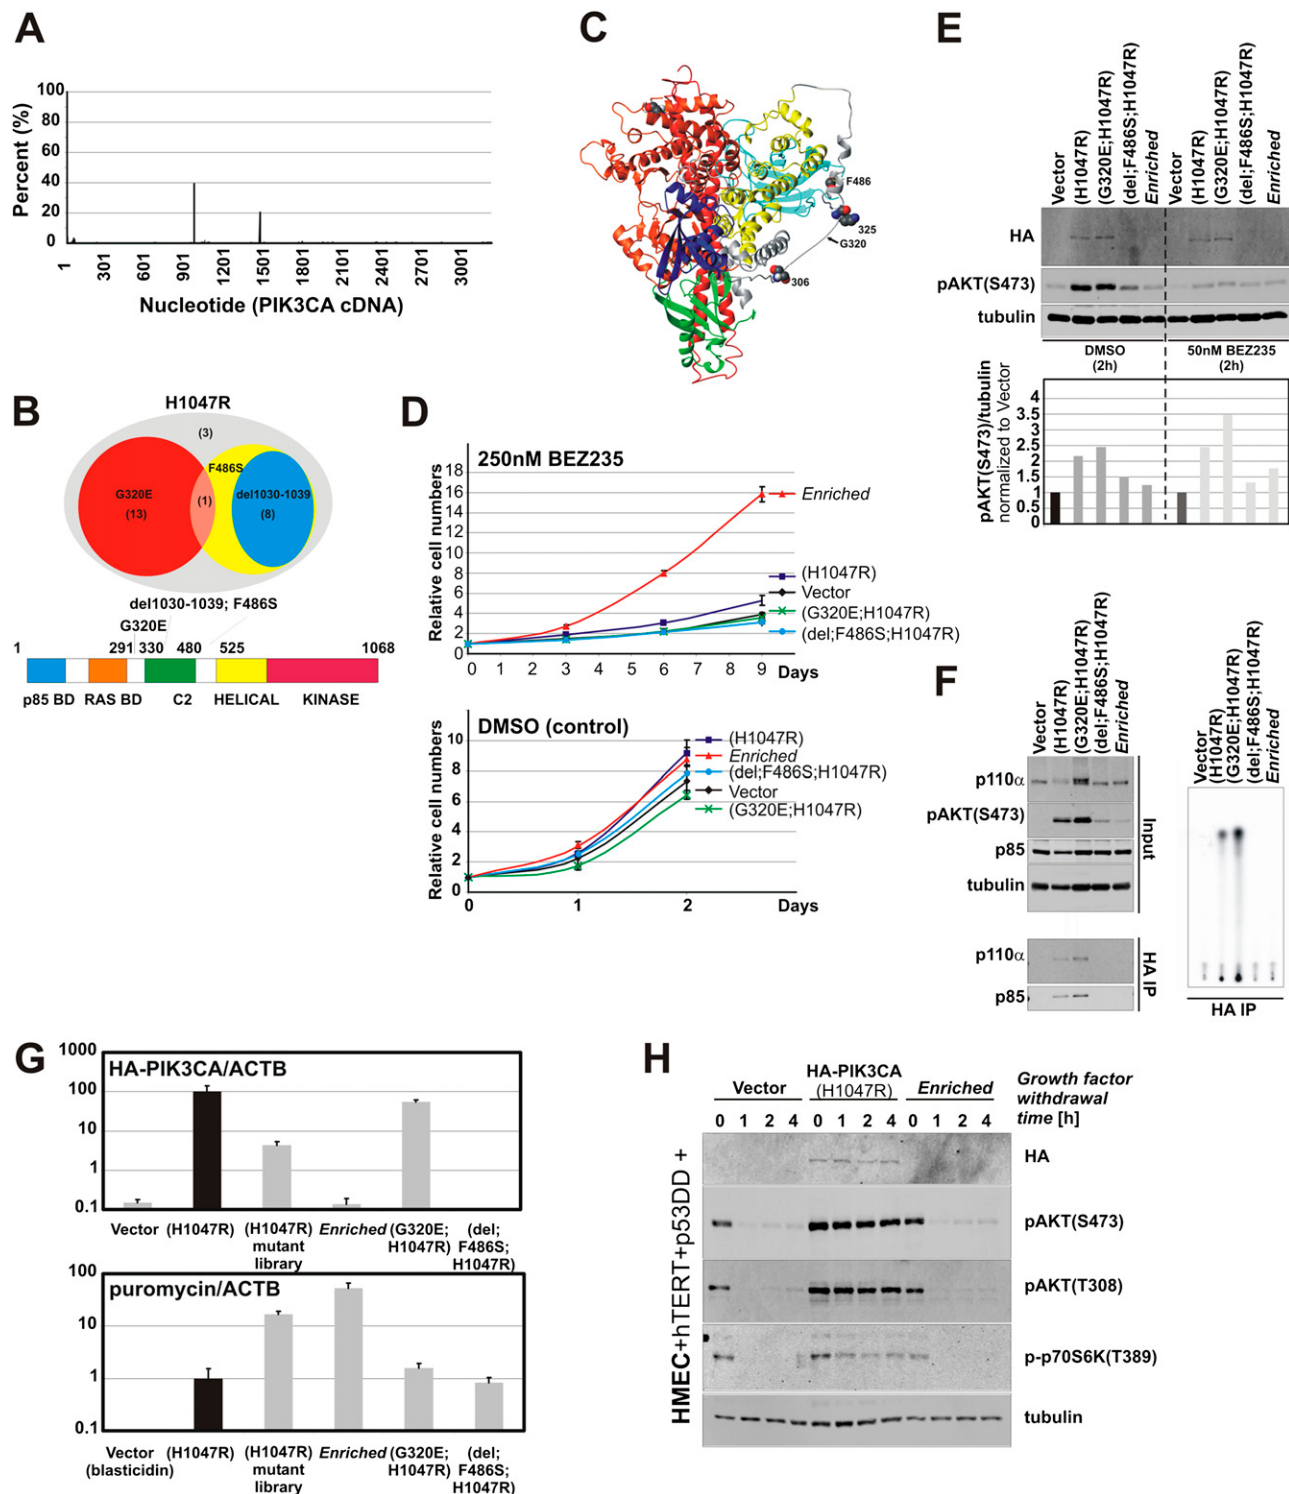

**Fig. S1.** Mutational analysis of BEZ235-resistant cells (related to Fig. 2). (A) SOLiD deep sequencing analysis of the exogenous PIK3CA(H1047R) alleles expressed in the BEZ235-resistant *Enriched* cells indicating the presence of two point mutations: G320E and F486S substitutions. (B) Results of manual sequencing of TOPO (Invitrogen) subclones of 28 individual exogenous PIK3CA(H1047R) alleles from the *Enriched* cells indicating preponderance of two alleles—G320E and

Legend continued on following page

1. Huang C-H, et al. (2007) The structure of a human p110 $\alpha$ /p85 $\alpha$  complex elucidates the effects of oncogenic PI3K $\alpha$  mutations. *Science* 318:1744–1748.

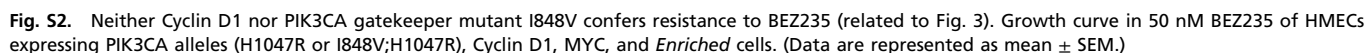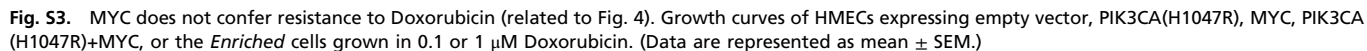

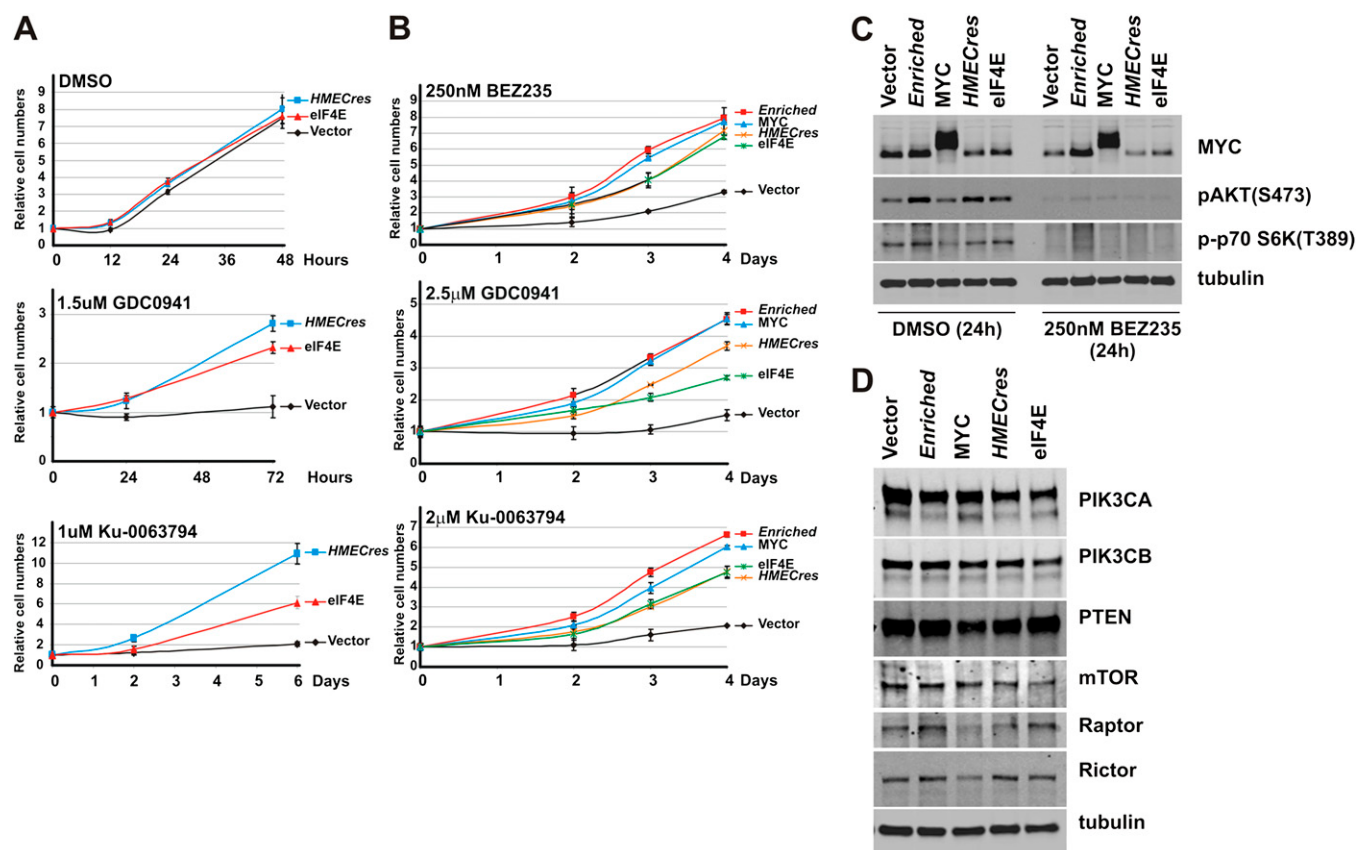



**Table S2. Genes contained within the chromosome 4 amplicon in the *HMECres* BEZ235-resistant cells (related to Fig. 6)**

| Abbreviation | Gene                                                                   |
|--------------|------------------------------------------------------------------------|
| BMPR1B       | Bone morphogenetic protein receptor, type Ib                           |
| UNC5C        | UNC5, <i>Caenorhabditis elegans</i> , homolog of c                     |
| PDHA2        | Pyruvate dehydrogenase, e1- $\alpha$ polypeptide, testis-specific form |
| C4orf37      | Chromosome 4 ORF 37                                                    |
| RAP1GDS      | RAP1, GTP-GDP dissociation stimulator 1                                |
| TSPAN5       | Tetraspanin 5                                                          |
| EIF4E        | Eukaryotic translation initiation factor 4E                            |
| METAP1       | Methionyl aminopeptidase 1                                             |
| ADH5         | Alcohol dehydrogenase 5 (class III), $\chi$ -polypeptide               |
| ADH4         | Alcohol dehydrogenase 4 (class II), $\pi$ -polypeptide                 |
| ADH6         | Alcohol dehydrogenase 6 (class V)                                      |
| ADH1A        | Alcohol dehydrogenase 1A (class I), $\alpha$ -polypeptide              |
| ADH1B        | Alcohol dehydrogenase 1B (class I), $\beta$ -polypeptide               |
| ADH7         | Alcohol dehydrogenase 7 (class IV), $\mu$ - or $\sigma$ -polypeptide   |
| C4orf17      | Chromosome 4 ORF 17                                                    |
| RG9MTD2      | RNA (guanine-9-) methyltransferase domain containing 2                 |
| MTTP         | Microsomal triglyceride transfer protein                               |
| DAPP1        | Dual adaptor of phosphotyrosine and 3-phosphoinositides                |
| LAMTOR3      | Late endosomal/lysosomal adaptor, MAPK and MTOR activator 3            |
| DNAJB14      | DnaJ (Hsp40) homolog, subfamily B, member 14                           |
| H2AFZ        | H2A histone family, member Z                                           |
| DDIT4L       | DNA damage-inducible transcript 4-like                                 |
| EMCN         | Endomucin                                                              |
